# Supplementary material for: Experimental and mathematical modelling of magnetically labelled mesenchymal stromal cell delivery
Source: bioRxiv or medRxiv preprint supplement (doi:10.1101/2020.10.27.356725), 2020-10-28
Supplement: Supplementary file [file media-2.pdf]

| RAW DATA       |           |           |                    |                      |                    |             |             |             |           |                    |
|----------------|-----------|-----------|--------------------|----------------------|--------------------|-------------|-------------|-------------|-----------|--------------------|
| Group          | Trapped   |           |                    |                      |                    | Untrapped   |             |             |           |                    |
|                | Sample 1  | Sample 2  | Sample 2           | Average              | Standard Deviation | Sample 1    | Sample 2    | Sample 2    | Average   | Standard Deviation |
| 0% RBC - MNPs  | 17        | 25        | 30                 | 24                   | 6.557438524        | 96          | 138         | 116         | 116.66667 | 21.00793501        |
| 0% RBC + MNP   | 133       | 87        | 104                | 108                  | 23.2594067         | 95          | 128         | 86          | 103       | 22.11334439        |
| 1% RBC - MNPs  | 9         | 11        | 22                 | 14                   | 7                  | 2110        | 1380        | 1700        | 1730      | 365.9234893        |
| 1% RBC + MNP   | 141       | 127       | 174                | 147.3333333          | 24.13158373        | 740         | 930         | 780         | 816.66667 | 100.166528         |
| 5% RBC - MNPs  | 5         | 6         | 8                  | 6.333333333          | 1.527525232        | 1150        | 1140        | 1370        | 1220      | 130                |
| 5% RBC + MNP   | 125       | 75        | 101                | 100.3333333          | 25.00666578        | 1010        | 1030        | 910         | 983.33333 | 64.29100507        |
| 10% RBC - MNPs | 11        | 13        | 8                  | 10.66666667          | 2.516611478        | 560         | 1030        | 840         | 810       | 236.4318084        |
| 10% RBC + MNP  | 85        | 25        | 58                 | 56                   | 30.0499584         | 1080        | 1860        | 1170        | 1370      | 426.7317659        |
| 20% RBC - MNP  | 29        | 46        | 33                 | 36                   | 8.888194417        | 5880        | 6530        | 5550        | 5986.6667 | 498.6314604        |
| 20% RBC + MNPs | 108       | 56        | 42                 | 68.66666667          | 34.77547028        | 1730        | 700         | 460         | 963.33333 | 674.7098142        |
| 40% RBC + MNP  | 56        | 43        | 31                 | 43.33333333          | 12.50333289        | 2180        | 3170        | 2910        | 2753.3333 | 513.2575702        |
| PROCESSED DATA |           |           |                    |                      |                    |             |             |             |           |                    |
| Group          | Trapped   | Untrapped | Percentage Trapped | Percentage Untrapped |                    |             |             |             |           |                    |
| 0% RBC - MNPs  | 24        | 116.6667  | 17.06              | 82.94                |                    |             |             |             |           |                    |
| 0% RBC + MNP   | 108       | 103       | 51.18              | 48.82                |                    |             |             |             |           |                    |
| 1% RBC - MNPs  | 14        | 1730      | 0.80               | 99.20                |                    |             |             |             |           |                    |
| 1% RBC + MNP   | 147.33333 | 816.6667  | 15.28              | 84.72                |                    |             |             |             |           |                    |
| 5% RBC - MNPs  | 6.3333333 | 1220      | 0.52               | 99.48                |                    |             |             |             |           |                    |
| 5% RBC + MNP   | 100.33333 | 983.3333  | 9.26               | 90.74                |                    |             |             |             |           |                    |
| 10% RBC - MNPs | 10.666667 | 810       | 1.30               | 98.70                |                    |             |             |             |           |                    |
| 10% RBC + MNP  | 56        | 1370      | 3.93               | 96.07                |                    |             |             |             |           |                    |
| 20% RBC - MNP  | 36        | 5986.667  | 0.60               | 99.40                |                    |             |             |             |           |                    |
| 20% RBC + MNPs | 68.666667 | 963.3333  | 6.65               | 93.35                |                    |             |             |             |           |                    |
| 40% RBC + MNP  | 43.333333 | 2753.333  | 1.55               | 98.45                |                    |             |             |             |           |                    |
| STDEV          |           |           |                    |                      |                    |             |             |             |           |                    |
| Group          | Trapped   |           |                    |                      |                    | Untrapped   |             |             |           |                    |
|                | Sample 1  | Sample 2  | Sample 2           | Average              | STDEV              | Sample 1    | Sample 2    | Sample 2    | Average   | STDEV              |
| 0% RBC - MNPs  | 15.044248 | 15.33742  | 20.54794521        | 16.97653877          | 3.096400479        | 84.95575221 | 84.66257669 | 79.45205479 | 83.023461 | 3.096400479        |
| 0% RBC + MNP   | 58.333333 | 40.46512  | 54.73684211        | 51.17843057          | 9.450662128        | 41.66666667 | 59.53488372 | 45.26315789 | 48.821569 | 9.450662128        |
| 1% RBC - MNPs  | 0.4247286 | 0.790798  | 1.277584204        | 0.831036946          | 0.427849309        | 99.57527135 | 99.20920201 | 98.7224158  | 99.168963 | 0.427849309        |
| 1% RBC + MNP   | 16.00454  | 12.01514  | 18.23899371        | 15.41955706          | 3.152895743        | 83.9954597  | 87.98486282 | 81.76100629 | 84.580443 | 3.152895743        |
| 5% RBC - MNPs  | 0.4329004 | 0.52356   | 0.580551524        | 0.512337389          | 0.074462574        | 99.56709957 | 99.47643979 | 99.41944848 | 99.487663 | 0.074462574        |
| 5% RBC + MNP   | 11.013216 | 6.78733   | 9.990108803        | 9.26355166           | 2.204640813        | 88.98678414 | 93.21266968 | 90.0098912  | 90.736448 | 2.204640813        |
| 10% RBC - MNPs | 1.9264448 | 1.246405  | 0.943396226        | 1.372081887          | 0.503430458        | 98.07355517 | 98.7535954  | 99.05660377 | 98.627918 | 0.503430458        |
| 10% RBC + MNP  | 7.2961373 | 1.32626   | 4.723127036        | 4.448508107          | 2.994398218        | 92.70386266 | 98.67374005 | 95.27687296 | 95.551492 | 2.994398218        |
| 20% RBC - MNP  | 0.4907768 | 0.699513  | 0.591080064        | 0.593790076          | 0.104394685        | 99.50922322 | 99.30048662 | 99.40891994 | 99.40621  | 0.104394685        |
| 20% RBC + MNPs | 5.8759521 | 7.407407  | 8.366533865        | 7.216631131          | 1.256203027        | 94.12404788 | 92.59259259 | 91.63346614 | 92.783369 | 1.256203027        |
| 40% RBC + MNP  | 2.5044723 | 1.338313  | 1.054063244        | 1.632282873          | 0.768593037        | 97.49552773 | 98.6616869  | 98.94593676 | 98.367717 | 0.768593037        |

Table S1: Raw data used to calculate the trapping results for the small magnet (strength 0.2T), Figure 7a.
